# Supplementary material for: Comfort and Coordination among Interprofessional Care Providers Involved in Intubations in the Pediatric Intensive Care Unit
Source: Hindawi journal article supplement (doi:10.1155/2023/4504934), 2023-01-01

## Bedside Nurse

### Pre-Intervention Data Collection Form

#### Nursing Experience

- |                         |                                  |                                    |                                     |                                    |
|-------------------------|----------------------------------|------------------------------------|-------------------------------------|------------------------------------|
| 1) Nursing experience:  | <input type="checkbox"/> <1 year | <input type="checkbox"/> 1-3 years | <input type="checkbox"/> 4-10 years | <input type="checkbox"/> >10 years |
| 2) PICU experience:     | <input type="checkbox"/> <1 year | <input type="checkbox"/> 1-3 years | <input type="checkbox"/> 4-10 years | <input type="checkbox"/> >10 years |
| 3) JHH PICU experience: | <input type="checkbox"/> <1 year | <input type="checkbox"/> 1-3 years | <input type="checkbox"/> 4-10 years | <input type="checkbox"/> >10 years |

#### Patient Information

- |                                                           |                              |                             |                                  |
|-----------------------------------------------------------|------------------------------|-----------------------------|----------------------------------|
| 1) Is this patient a known difficult airway?              | <input type="checkbox"/> Yes | <input type="checkbox"/> No | <input type="checkbox"/> Unknown |
| 2) Is this patient a documented difficult airway in Epic? | <input type="checkbox"/> Yes | <input type="checkbox"/> No | <input type="checkbox"/> N/A     |

#### Intubation Event

- 1) What medications were administered during the intubation process?

|                                    |                                          |                                    |                                     |                                          |                                     |
|------------------------------------|------------------------------------------|------------------------------------|-------------------------------------|------------------------------------------|-------------------------------------|
| <input type="checkbox"/> Atropine  | <input type="checkbox"/> Dexmedetomidine | <input type="checkbox"/> Etomidate | <input type="checkbox"/> Fentanyl   | <input type="checkbox"/> Glycopyrrolate  | <input type="checkbox"/> Ketamine   |
| <input type="checkbox"/> Lidocaine | <input type="checkbox"/> Midazolam       | <input type="checkbox"/> Propofol  | <input type="checkbox"/> Rocuronium | <input type="checkbox"/> Succinylcholine | <input type="checkbox"/> Vecuronium |

☐ Other(s): \_\_\_\_\_

#### Process Improvement

- 1) a. Were you aware of the entire intubation plan before the start of the procedure? ☐ Yes ☐ No

b. On a scale of 1-10, did you feel well-informed about the intubation plan? \_\_\_\_\_

1 = Not well informed, 5 = Fairly informed with room for improvement, 10 = Very well informed, comfortable with plan

- 2) a. Do you think the intubation process could have gone more smoothly? ☐ Yes ☐ No

b. On a scale of 1-10, how smoothly do you think the intubation process went? \_\_\_\_\_

\*Please consider the pre/post-intubation periods as well as the time during which intubation was occurring.

1 = Not smoothly at all, 5 = Fairly smoothly with room for improvement, 10 = Very smoothly, no improvements necessary

- 3) Were the criteria to intubate discussed prior to intubation? ☐ Yes ☐ No

- 4) a. Was any additional *equipment* required during the intubation that was not present at the bedside prior to intubation? ☐ Yes ☐ No

b. If so, what equipment? \_\_\_\_\_

- 5) a. Were any additional *medications* required during the intubation that were not present at the bedside prior to intubation? ☐ Yes ☐ No

b. If so, which medicines? \_\_\_\_\_

- 6) Other comments about the intubation process: \_\_\_\_\_

Please place patient label here (or provide MRN).

May also use back of page  
(just indicate with arrow).

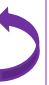

Supplement: f1 [file 4504934.f1.zip]
