# Supplementary material for: Comfort and Coordination among Interprofessional Care Providers Involved in Intubations in the Pediatric Intensive Care Unit
Source: Hindawi journal article supplement (doi:10.1155/2023/4504934), 2023-01-01
Supplement: f1 [file 4504934.f1.zip]

## Respiratory Therapist

### Pre-Intervention Data Collection Form

#### RT Experience

- |                         |                                  |                                    |                                     |                                    |
|-------------------------|----------------------------------|------------------------------------|-------------------------------------|------------------------------------|
| 1) RT experience:       | <input type="checkbox"/> <1 year | <input type="checkbox"/> 1-3 years | <input type="checkbox"/> 4-10 years | <input type="checkbox"/> >10 years |
| 2) PICU experience:     | <input type="checkbox"/> <1 year | <input type="checkbox"/> 1-3 years | <input type="checkbox"/> 4-10 years | <input type="checkbox"/> >10 years |
| 3) JHH PICU experience: | <input type="checkbox"/> <1 year | <input type="checkbox"/> 1-3 years | <input type="checkbox"/> 4-10 years | <input type="checkbox"/> >10 years |

#### Intubation Event

- |                                                                              |                              |                             |
|------------------------------------------------------------------------------|------------------------------|-----------------------------|
| 1) a. Was optimal positioning of the patient discussed prior to intubation?  | <input type="checkbox"/> Yes | <input type="checkbox"/> No |
| b. Was optimal positioning of the patient achieved during intubation?        | <input type="checkbox"/> Yes | <input type="checkbox"/> No |
| c. Was it necessary to reposition the patient after the start of intubation? | <input type="checkbox"/> Yes | <input type="checkbox"/> No |

#### Process Improvement

- |                                                                                |                              |                             |
|--------------------------------------------------------------------------------|------------------------------|-----------------------------|
| 1) a. Was all of the respiratory equipment checked prior to intubation?        | <input type="checkbox"/> Yes | <input type="checkbox"/> No |
| b. Was all necessary respiratory equipment at the bedside prior to intubation? | <input type="checkbox"/> Yes | <input type="checkbox"/> No |

- |                                                                        |                              |                             |
|------------------------------------------------------------------------|------------------------------|-----------------------------|
| 2) a. Was the patient pre-oxygenated using a tightly sealed face mask? | <input type="checkbox"/> Yes | <input type="checkbox"/> No |
| b. If so, for approximately how long? _____                            |                              |                             |

- |                                                                                       |                              |                             |
|---------------------------------------------------------------------------------------|------------------------------|-----------------------------|
| 3) a. Were you aware of the entire intubation plan before the start of the procedure? | <input type="checkbox"/> Yes | <input type="checkbox"/> No |
|---------------------------------------------------------------------------------------|------------------------------|-----------------------------|

b. On a scale of 1-10, did you feel well-informed about the intubation plan? \_\_\_\_\_  
1 = Not well informed, 5 = Fairly informed with room for improvement, 10 = Very well informed, comfortable with plan

- |                                                                          |                              |                             |
|--------------------------------------------------------------------------|------------------------------|-----------------------------|
| 4) a. Do you think the intubation process could have gone more smoothly? | <input type="checkbox"/> Yes | <input type="checkbox"/> No |
|--------------------------------------------------------------------------|------------------------------|-----------------------------|

b. On a scale of 1-10, how smoothly do you think the intubation process went? \_\_\_\_\_  
\*Please consider the pre/post-intubation periods as well as the time during which intubation was occurring.  
1 = Not smoothly at all, 5 = Fairly smoothly with room for improvement, 10 = Very smoothly, no improvements necessary

- |                                                                 |                              |                             |
|-----------------------------------------------------------------|------------------------------|-----------------------------|
| 5) Were the criteria to intubate discussed prior to intubation? | <input type="checkbox"/> Yes | <input type="checkbox"/> No |
|-----------------------------------------------------------------|------------------------------|-----------------------------|

- 6) Other comments about the intubation process: \_\_\_\_\_

Please place patient label here (or provide MRN).
