# Supplementary material for: Comfort and Coordination among Interprofessional Care Providers Involved in Intubations in the Pediatric Intensive Care Unit
Source: Hindawi journal article supplement (doi:10.1155/2023/4504934), 2023-01-01
Supplement: f1 [file 4504934.f1.zip]

## Physician

### Pre-Intervention Data Collection Form

#### Intubation Planning

- 1) 1<sup>st</sup> reason for PICU admission:
- |                                                    |                                                    |
|----------------------------------------------------|----------------------------------------------------|
| <input type="checkbox"/> Upper respiratory disease | <input type="checkbox"/> Lower respiratory disease |
| <input type="checkbox"/> Cardiac (medical)         | <input type="checkbox"/> Cardiac (surgical)        |
| <input type="checkbox"/> Shock/sepsis              | <input type="checkbox"/> Neurological              |
| <input type="checkbox"/> Trauma                    | <input type="checkbox"/> Other: _____              |
- 2) 1<sup>st</sup> indication for intubation:
- |                                                       |                                                   |
|-------------------------------------------------------|---------------------------------------------------|
| <input type="checkbox"/> Oxygenation failure          | <input type="checkbox"/> Ventilation failure      |
| <input type="checkbox"/> Therapeutic hyperventilation | <input type="checkbox"/> Neuromuscular weakness   |
| <input type="checkbox"/> Impaired airway reflex       | <input type="checkbox"/> Upper airway obstruction |
| <input type="checkbox"/> Hemodynamic instability      | <input type="checkbox"/> Elective procedure       |
| <input type="checkbox"/> Pulmonary toilet             | <input type="checkbox"/> Other: _____             |
- 3) Urgency of intubation:
- ☐ Intubation without delay  
☐ Intubation within 1 hour  
☐ Intubation >1 hour
- 4) Features associated with difficult airway (check all that apply)?
- |                                                   |                                                  |
|---------------------------------------------------|--------------------------------------------------|
| <input type="checkbox"/> None                     | <input type="checkbox"/> Midface hypoplasia      |
| <input type="checkbox"/> Limited mouth opening    | <input type="checkbox"/> Small thyromental space |
| <input type="checkbox"/> Limited neck extension   | <input type="checkbox"/> Other: _____            |
| <input type="checkbox"/> Upper airway obstruction |                                                  |
- 5) Intubating provider(s):
- |                                                                                                                                                                                                                                                                                                                                                                                                                                                                                                                                                                                                    |                                                                                                                                                                                                                                                                                                                                                                                                                                                                                                                                                                                                                    |                                                                                                                                                                                                                                                                                                                                                                                                                                                                                                                                                                                                                    |
|----------------------------------------------------------------------------------------------------------------------------------------------------------------------------------------------------------------------------------------------------------------------------------------------------------------------------------------------------------------------------------------------------------------------------------------------------------------------------------------------------------------------------------------------------------------------------------------------------|--------------------------------------------------------------------------------------------------------------------------------------------------------------------------------------------------------------------------------------------------------------------------------------------------------------------------------------------------------------------------------------------------------------------------------------------------------------------------------------------------------------------------------------------------------------------------------------------------------------------|--------------------------------------------------------------------------------------------------------------------------------------------------------------------------------------------------------------------------------------------------------------------------------------------------------------------------------------------------------------------------------------------------------------------------------------------------------------------------------------------------------------------------------------------------------------------------------------------------------------------|
| <b>Provider #1</b><br><u>Level of training:</u><br><input type="checkbox"/> Resident <input type="checkbox"/> Fellow<br><input type="checkbox"/> Attending <input type="checkbox"/> NP<br><input type="checkbox"/> Med student<br><br><u>Discipline:</u><br><input type="checkbox"/> Peds <input type="checkbox"/> Anes<br><input type="checkbox"/> Ped/Anes <input type="checkbox"/> ED<br><br><u>Prior successful intubations:</u><br><input type="checkbox"/> None <input type="checkbox"/> 1-5<br><input type="checkbox"/> 6-10 <input type="checkbox"/> 11-39<br><input type="checkbox"/> 40+ | <b>Provider #2 (if applicable)</b><br><u>Level of training:</u><br><input type="checkbox"/> Resident <input type="checkbox"/> Fellow<br><input type="checkbox"/> Attending <input type="checkbox"/> NP<br><input type="checkbox"/> Med student<br><br><u>Discipline:</u><br><input type="checkbox"/> Peds <input type="checkbox"/> Anes<br><input type="checkbox"/> Ped/Anes <input type="checkbox"/> ED<br><br><u>Prior successful intubations:</u><br><input type="checkbox"/> None <input type="checkbox"/> 1-5<br><input type="checkbox"/> 6-10 <input type="checkbox"/> 11-39<br><input type="checkbox"/> 40+ | <b>Provider #3 (if applicable)</b><br><u>Level of training:</u><br><input type="checkbox"/> Resident <input type="checkbox"/> Fellow<br><input type="checkbox"/> Attending <input type="checkbox"/> NP<br><input type="checkbox"/> Med student<br><br><u>Discipline:</u><br><input type="checkbox"/> Peds <input type="checkbox"/> Anes<br><input type="checkbox"/> Ped/Anes <input type="checkbox"/> ED<br><br><u>Prior successful intubations:</u><br><input type="checkbox"/> None <input type="checkbox"/> 1-5<br><input type="checkbox"/> 6-10 <input type="checkbox"/> 11-39<br><input type="checkbox"/> 40+ |
|----------------------------------------------------------------------------------------------------------------------------------------------------------------------------------------------------------------------------------------------------------------------------------------------------------------------------------------------------------------------------------------------------------------------------------------------------------------------------------------------------------------------------------------------------------------------------------------------------|--------------------------------------------------------------------------------------------------------------------------------------------------------------------------------------------------------------------------------------------------------------------------------------------------------------------------------------------------------------------------------------------------------------------------------------------------------------------------------------------------------------------------------------------------------------------------------------------------------------------|--------------------------------------------------------------------------------------------------------------------------------------------------------------------------------------------------------------------------------------------------------------------------------------------------------------------------------------------------------------------------------------------------------------------------------------------------------------------------------------------------------------------------------------------------------------------------------------------------------------------|

#### Intubation Event

- 1) Time of intubation: ☐ Date: \_\_\_\_\_ ☐ Time: \_\_\_\_\_
- 2) Route of intubation: ☐ Oral ☐ Nasal
- 3) How many times was intubation attempted\* by each provider?  
\*Attempt: A single advanced airway maneuver (e.g., beginning with insertion of laryngoscope into patient's mouth and ending when scope is removed).
- Provider #1: \_\_\_\_\_ Provider #2 (if applicable): \_\_\_\_\_ Provider #3 (if applicable): \_\_\_\_\_
- 4) Which provider successfully placed the endotracheal tube?
- ☐ Provider #1  
☐ Provider #2  
☐ Provider #3
- 5) How was intubation confirmed (check all that apply)?
- ☐ Direct visualization of ETT passing through vocal cords  
☐ Chest rise  
☐ Auscultation  
☐ ETCO2 detection  
☐ CXR

OVER

Reducing Tracheal Intubation Associated Events in the PICU  
Quality Improvement Project

- 6) a. Were there any desaturations\*? ☐ Yes ☐ No  
\*Desaturation: SpO<sub>2</sub> < 90% (in nonmixing patients) or drop in SpO<sub>2</sub> >10% below baseline SpO<sub>2</sub> (in mixing patients).

b. If so, how many? \_\_\_\_\_

- 7) Was there bradycardia\*? ☐ Yes ☐ No  
\*Bradycardia: Drop in heart rate >20% below baseline heart rate.

- 8) Was a timeout performed with all team members present and attentive? ☐ Yes ☐ No

- 9) a. Were there any immediate complications that occurred with intubation? ☐ Yes ☐ No

b. If yes, please check all that apply:

**Severe Complications**

- ☐ Cardiac arrest requiring >1 minute of chest compressions\*
- ☐ Esophageal intubation with delayed recognition leading to deterioration in patient condition\*
- ☐ Hypotension (drop of MAP >20% below goal) requiring Intervention\*
- ☐ Emesis with aspiration
- ☐ Laryngospasm\*
- ☐ Malignant hypertension\*
- ☐ Pneumothorax or pneumomediastinum
- ☐ Dental or gum trauma
- ☐ Direct airway injury

**Non-Severe Complications**

- ☐ Mainstem bronchial intubation
- ☐ Esophageal intubation with immediate recognition
- ☐ Hypertension requiring intervention\*
- ☐ Emesis without aspiration
- ☐ Epistaxis
- ☐ Lip trauma
- ☐ Medication error
- ☐ Bradycardia\*
- ☐ Other dysrhythmia\*
- ☐ Pain or agitation requiring additional medications and delaying intubation

\*If any equipment or medications were used to correct the above complications, please indicate this on questions 4 and 5 below.

**Process Improvement**

- 1) a. Were you aware of the entire intubation plan before the start of the procedure? ☐ Yes ☐ No

b. On a scale of 1-10, did you feel well-informed about the intubation plan? \_\_\_\_\_

1 = Not well informed, 5 = Fairly informed with room for improvement, 10 = Very well informed, comfortable with plan

- 2) a. Do you think the intubation process could have gone more smoothly? ☐ Yes ☐ No

b. On a scale of 1-10, how smoothly do you think the intubation process went? \_\_\_\_\_

\*Please consider the pre/post-intubation periods as well as the time during which intubation was occurring.

1 = Not smoothly at all, 5 = Fairly smoothly with room for improvement, 10 = Very smoothly, no improvements necessary

- 3) Were the criteria to intubate discussed prior to intubation? ☐ Yes ☐ No

- 4) Was any additional *equipment* required during the intubation that was not present at the bedside prior to starting intubation? If so, what? ☐ Yes \_\_\_\_\_  
☐ No

- 5) Were any additional *medications* required during the intubation that were not present at the bedside prior to starting intubation? If so, which? ☐ Yes \_\_\_\_\_  
☐ No

- 6) Other comments about the intubation process: \_\_\_\_\_

Please place patient label here (or provide MRN).
