# Supplementary material for: Comfort and Coordination among Interprofessional Care Providers Involved in Intubations in the Pediatric Intensive Care Unit
Source: Crit Care Res Pract. 2023 Oct 4;2023:4504934. doi: 10.1155/2023/4504934 (PMC10567513; doi:10.1155/2023/4504934)
Supplement: Supplementary Materials — Supplementary Figures: preintervention data collection forms sent to physicians, RNs, and RTs after every intubation event. [file 4504934.f1.zip]

Archive with 3 entries (3 files):
- Tracheal Intubation Study Provider Form.pdf
- Tracheal Intubation Study RN Form.pdf
- Tracheal Intubation Study RT Form.pdf
